# Supplementary material for: p-wave triggered superconductivity in single-layer graphene on an electron-doped oxide superconductor
Source: Springer Nature journal article supplement (doi:10.1038/ncomms14024), 2017-01-19
Supplement: 41467_2017_BFncomms14024_MOESM784_ESM.pdf [file 41467_2017_BFncomms14024_MOESM784_ESM.pdf]

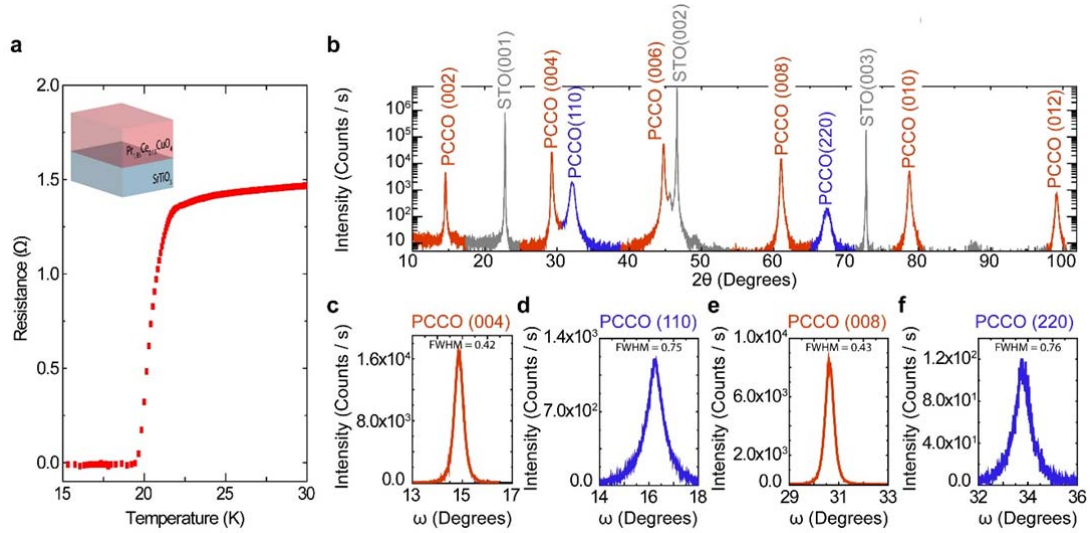

1  
 2 **Supplementary Figure 1. Electronic transport and X-ray characterization of PCCO on STO.** **a**,  
 3 Resistance versus temperature (R-T) curve measured in a liquid helium Dewar using a four-point  
 4 current-bias setup (10  $\mu$ A) showing a superconducting transition of approximately 20.5 K. Inset:  
 5 Schematic of sample structure. **b**, High angle X-ray diffraction data on a control film of 5 mm x 5 mm  
 6 PCCO/STO deposited using identical growth conditions to the samples investigated by scanning  
 7 tunneling microscopy. **c**, **d**, **e**, **f**, Rocking curves (omega scans) of the (004) (**c**), (006) (**d**), (008) (**e**),  
 8 (220) (**f**) PCCO film diffraction peaks showing a full width at half maximum of 0.42° (**c**),  
 9 0.43° (**e**), 0.76° (**f**).

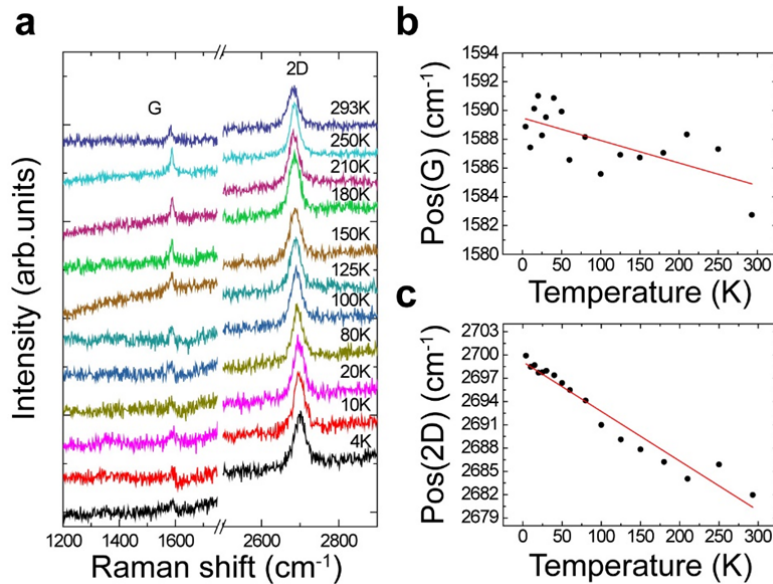

10  
 11 **Supplementary Figure 2. Raman data on SLG/PCCO/STO as a function of temperature.** **a**, **b**, **c**,  
 12 Raman spectra at 514.5 nm as a function of temperature for SLG on PCCO, after subtraction of the  
 13 PCCO on (001) STO background (**a**). Pos(G) (**b**) and Pos(2D) (**c**) as a function of temperature. The  
 14 fitted Pos(G) and Pos(2D) show a linear dependence on temperature (**b** and **c**) with a slope of  
 15  $\Delta\text{Pos(G)}/\Delta T = -0.016 \pm 0.003 \text{ cm}^{-1}/\text{K}$  and of  $\Delta\text{Pos(2D)}/\Delta T = -0.064 \pm 0.004 \text{ cm}^{-1}/\text{K}$ , respectively,  
 16 consistent with temperature-induced anharmonic effects<sup>1</sup>. This as well as the other fitting parameters  
 17  $I(2D)/I(G)_{4\text{K}} = 5.6$ ,  $I(2D)/I(G)_{150\text{K}} = 3.4$ ,  $I(2D)/I(G)_{293\text{K}} = 3.2$ ,  $A(2D)/A(G)_{4\text{K}} = 13.7$ ,  $A(2D)/A(G)_{150\text{K}} =$   
 18  $9.4$ ,  $A(2D)/A(G)_{293\text{K}} = 7.1$ , suggest that the doping level stays the same throughout the measurements,  
 19 i.e. < 100 meV. In addition, no defects are introduced in SLG with temperature, as shown by the  
 20 absence of a significant D peak<sup>2</sup>.

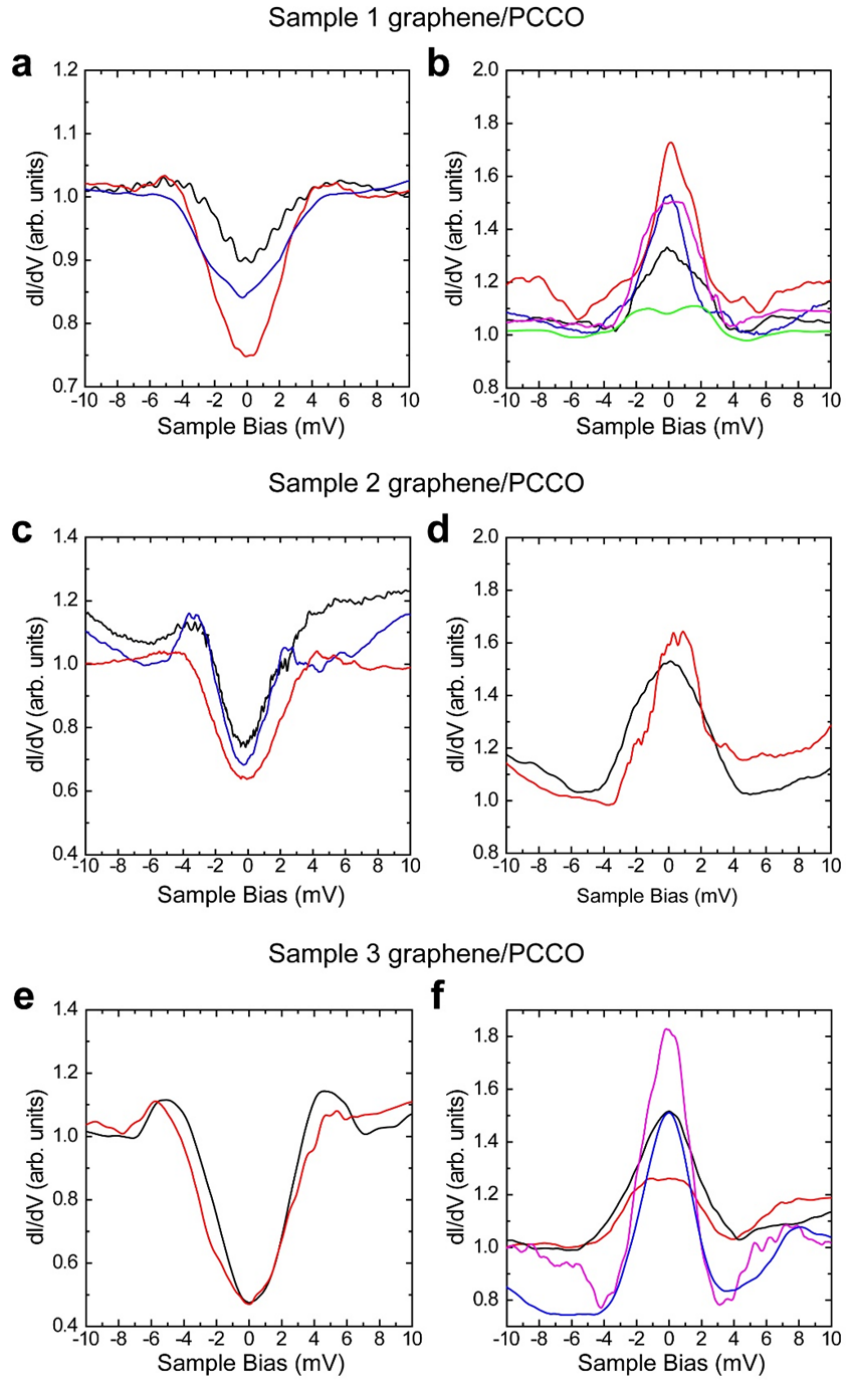

21

22

23 **Supplementary Figure 3. Density of states measurements on SLG/PCCO/STO. a, b, c, d, e, f,**  
 24 Scanning tunneling differential conductance as a function of bias voltage at 4.2 K on different  
 25 SLG/PCCO/STO samples, additional to those reported in Fig. 2 of the main text. For each sample,  
 26 both V-shaped BCS gaps (**a, c** and **e**) and ZBCPs or split-ZBCPs (**b, d, f**) are observed, consistently  
 27 with Fig. 2 and what discussed in the main text.

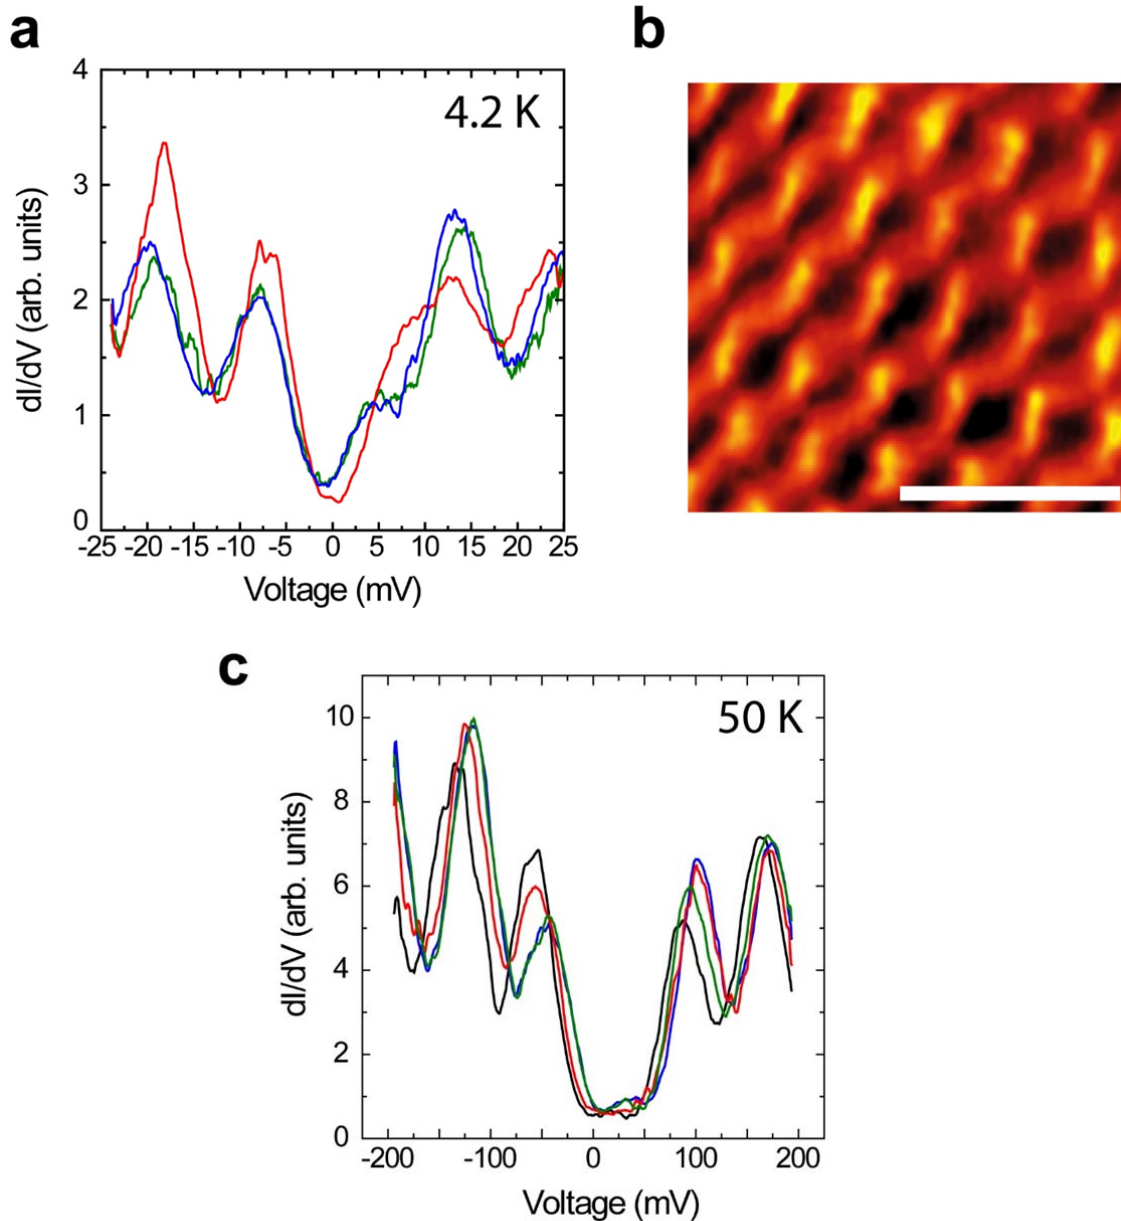

28  
 29 **Supplementary Figure 4. Density of states measurements on SLG/PCCO/STO showing single-**  
 30 **electron tunneling features. a, b,** Scanning tunneling differential conductance spectra as a function  
 31 of bias voltage measured at 4.2 K on SLG/PCCO/STO and showing single-electron tunnelling  
 32 features (**a**). These are typically measured in areas where the SLG local topography cannot be  
 33 resolved, as shown in (**b**) where the scale bar has a length of 0.5 nm. Such features were observed also  
 34 above  $T_c$ . The spectra presented in (**c**) were acquired at 50K on another region, where the effective  
 35 Coulomb island was smaller, giving rise to larger charging energy.  
 36  
 37

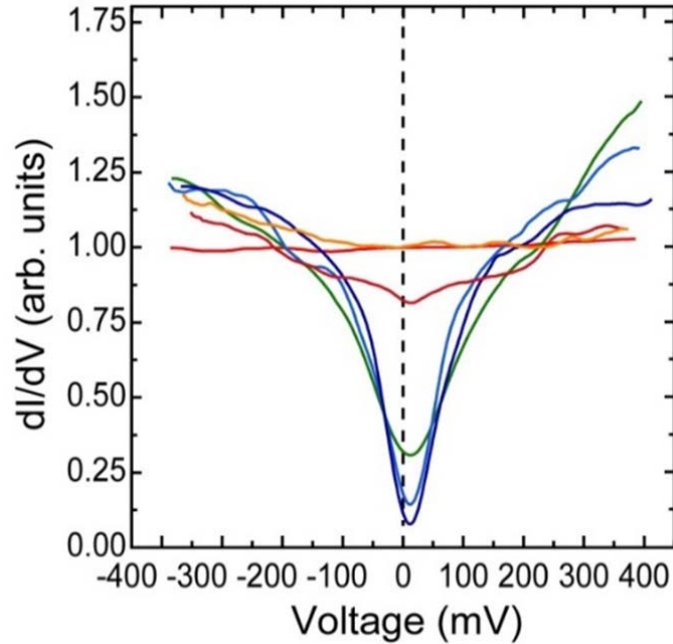

38  
 39 **Supplementary Figure 5. Density of states measurements on SLG/PCCO on STO above the**  
 40 **PCCO superconducting transition.** Scanning tunneling differential conductance as a function of  
 41 bias voltage at 50 ( $\pm 5$ ) K, i.e. above the PCCO superconducting critical temperature ( $T_c$ ), on  
 42 SLG/PCCO/STO areas where V-shaped gaps and ZBCPs are measured below  $T_c$  (blue and green  
 43 curves) and in areas where no superconductivity-related spectra features are found below  $T_c$  (orange  
 44 and red curves) and the topography did not show clear SLG structure.  
 45

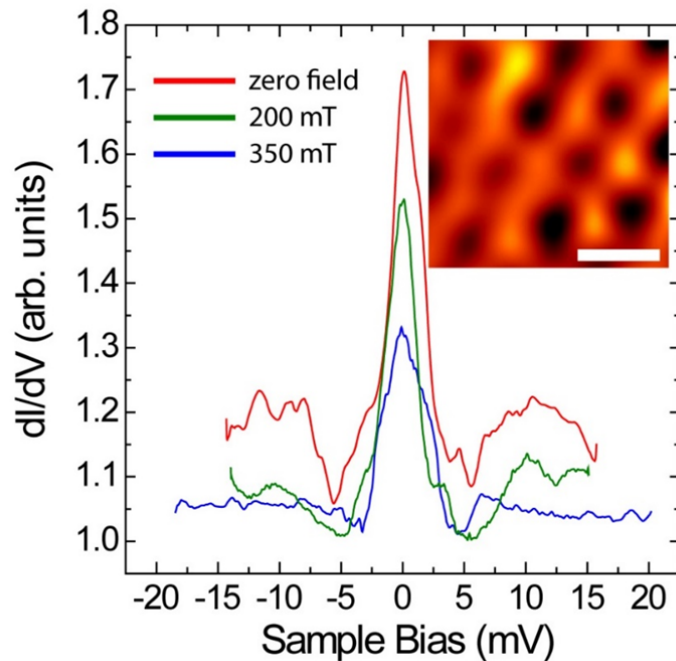

46  
 47 **Supplementary Figure 6. Magnetic field dependence of a zero-bias conductance peak on**  
 48 **SLG/PCCO/STO.** Scanning tunneling differential conductance as a function of bias voltage  
 49 measured at 4.2 K on SLG/PCCO/STO showing a zero-bias conductance peak and its evolution in an  
 50 applied out-of-plane magnetic field. The tunneling spectra were all acquired on the same spot, which

51 belongs to the sample area with SLG local topography shown in the inset (the scale bar has a length of  
 52 0.3 nm).

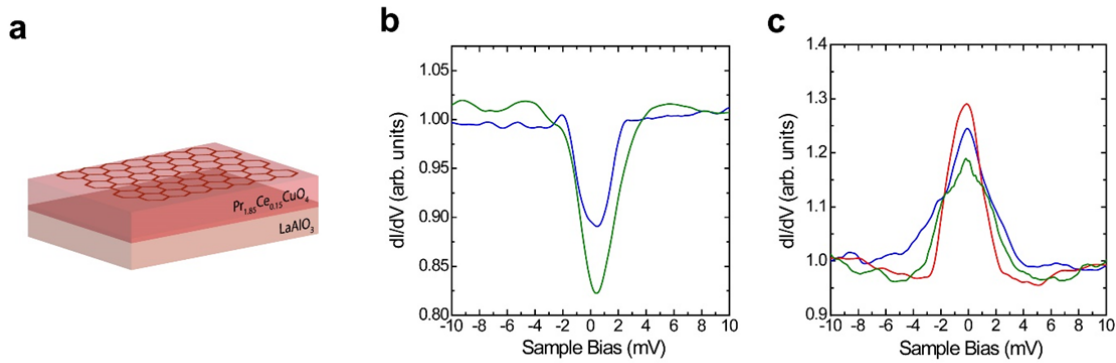

53  
 54 **Supplementary Figure 7. Density of states measurements on SLG/PCCO on LAO substrate.** **a,**  
 55 **b, c,** Scanning tunneling differential conductance as a function of bias voltage measured at 4.2 K on  
 56 SLG/PCCO on (001) oriented LAO substrate (the hexagonal lattice represents SLG). Schematic of  
 57 sample structure (**a**), V-shaped gaps (**b**), and ZBCPs (**c**).

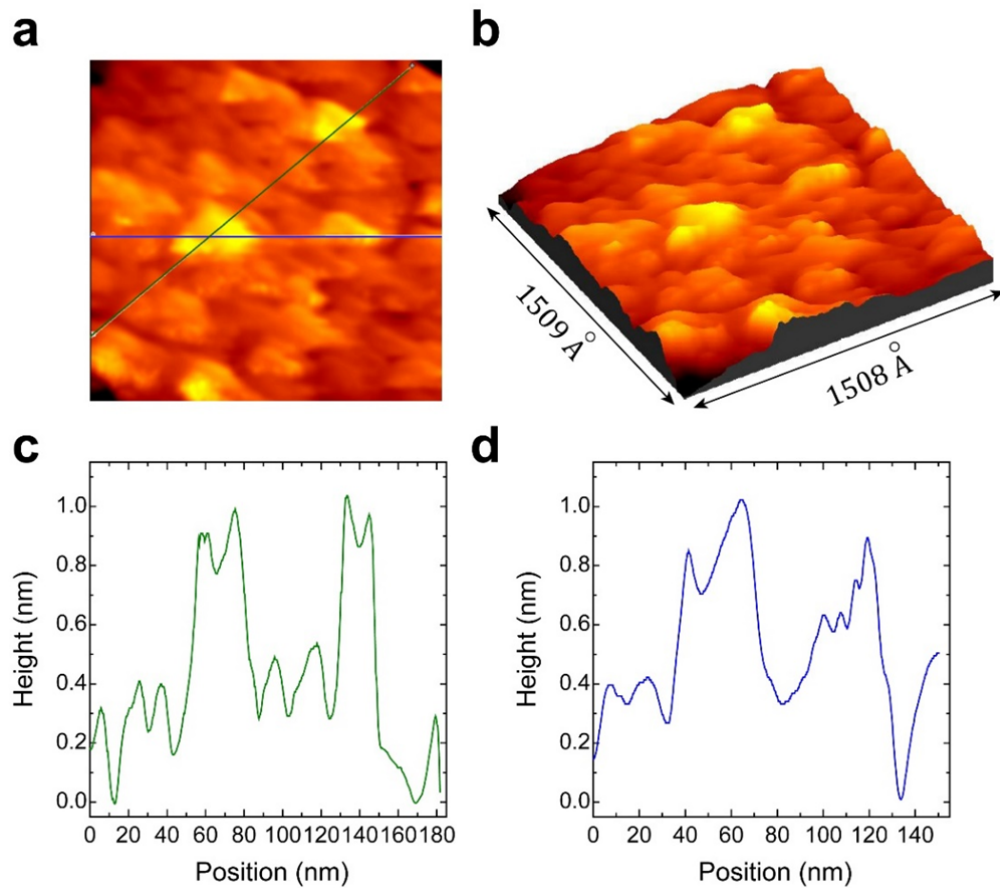

58  
 59 **Supplementary Figure 8. Topography of a Au/PCCO/STO sample.** **a, b,** Typical topography of a  
 60 Au thin film (10 nm) on PCCO/STO (**a**) and corresponding 3d image (**b**). **c, d,** Height profiles along  
 61 the two lines in (**a**) are reported in (**c**) and (**d**) in the same colour as the corresponding line scan.  
 62



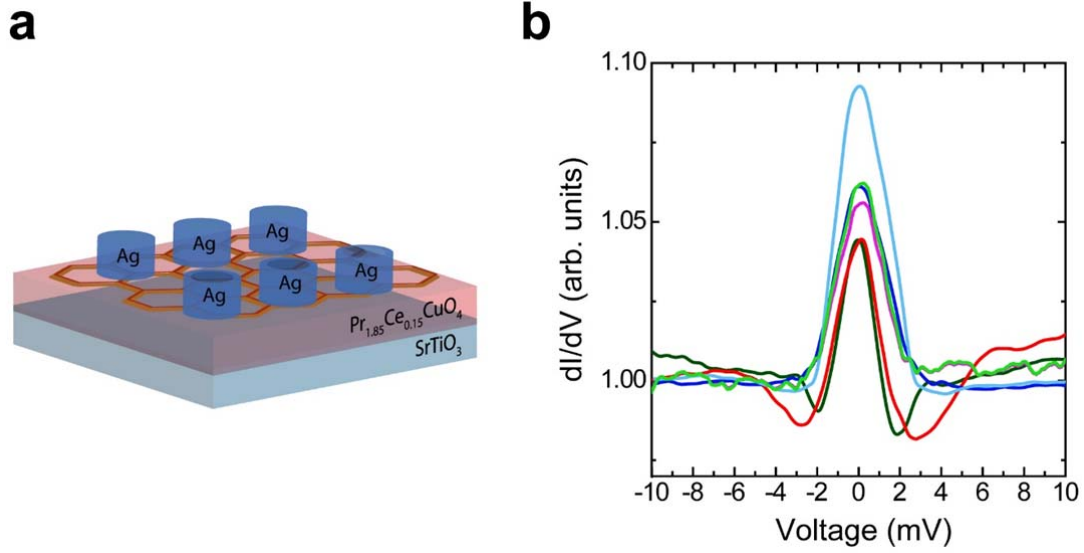

63  
 64 **Supplementary Figure 9. Density of states measurements on SLG/PCCO/STO with Ag**  
 65 **microislands.** (a) Schematic of sample structure. (b) Scanning tunnelling differential conductance as  
 66 a function of bias voltage additional to those reported in Fig. 3c of the main text, measured at 4.2 K  
 67 for a sample with Ag microislands on SLG (hexagonal lattice) on PCCO/STO. The tunneling spectra  
 68 shown are recorded on the SLG surface near three different Ag microislands. The spectra recorded  
 69 near the same Ag microisland are labelled in (b) with similar colours: blue and light blue for Ag  
 70 microisland 1, red and pink for Ag microisland 2, green and light green for Ag microisland 3.

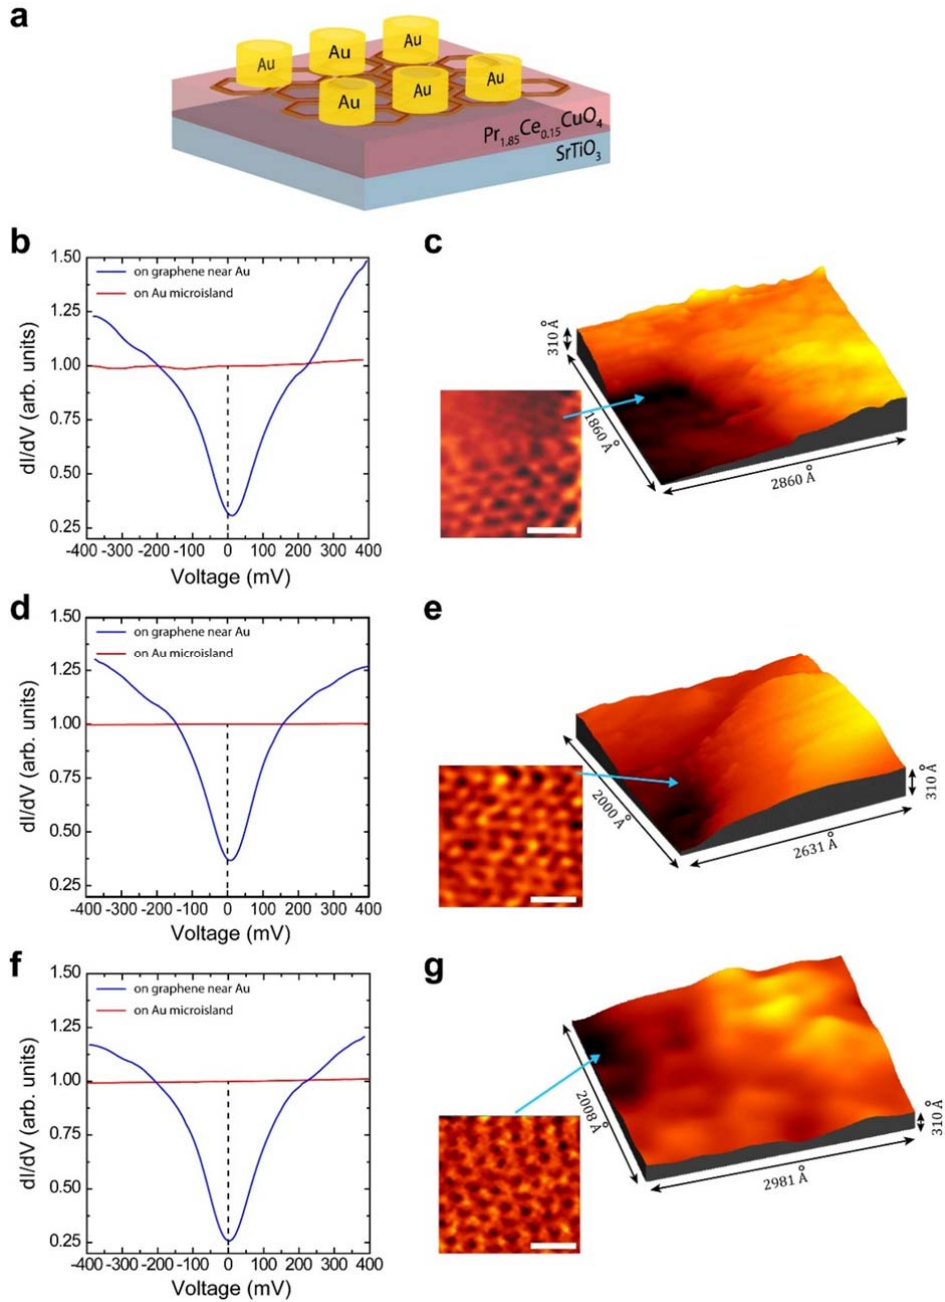

71  
72  
73  
74  
75  
76  
77  
78  
79

**Supplementary Figure 10. Density of states measurements on SLG/PCCO/STO with Au microislands.** (a) Schematic of sample structure (the hexagonal lattice represents SLG). (b, c, d, e, f, g), Scanning tunnelling differential conductance as a function of bias voltage measured at 4.2 K for samples with Au microislands on SLG/PCCO/STO. The tunneling spectra are measured both on SLG near Au microislands (blue curves) and directly on Au microislands (red curves). The tunneling spectra in (a), (d), (f) are measured near the corresponding Au microislands with topography shown in (c), (e) and (g), respectively (the scale bars in c, e, f have a length of 0.5 nm).

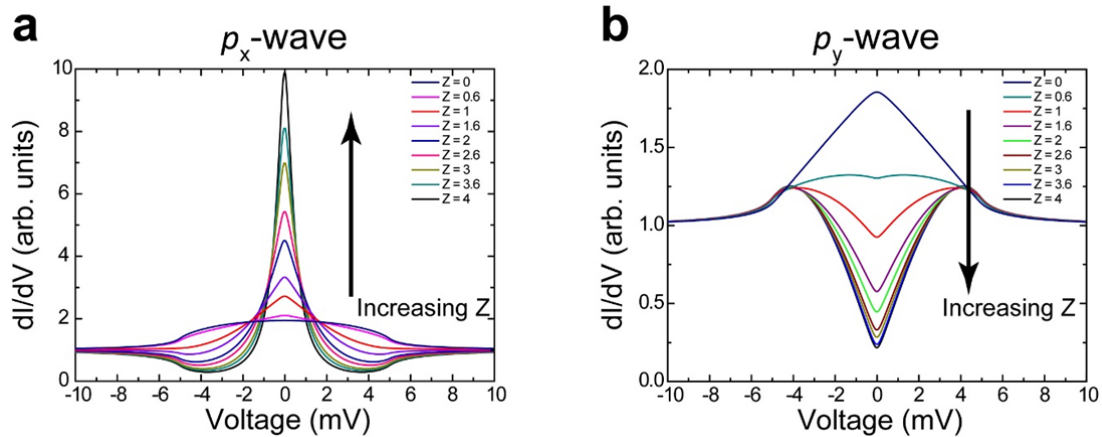

80  
81  
82  
83  
84

**Supplementary Figure 11. Theoretical density of states for SLG on PCCO. a, b,** Theoretical density of states spectra as a function of  $Z$  for SLG/PCCO under the hypothesis of induced (a)  $p_x$ -wave and (b)  $p_y$ -wave symmetry in SLG.



85 **Supplementary References**

86

87

88

89

90

91

92

1. Calizo, I., Balandin, A. A., Bao, W., Miao, F. & Lau, C. N. Temperature dependence of the Raman spectra of graphene and graphene multilayers. *Nano Lett.* **7**, 2645-2649 (2007).
2. Ferrari, A. C. & Robertson, J. Interpretation of Raman spectra of disordered and amorphous carbon. *Phys. Rev. B* **61**, 14095-14107 (2000).
